# Supplementary material for: Selective Targeting of Virus Replication by Proton Pump Inhibitors
Source: PubMed Central journal article supplement (PMC7055211; doi:10.1038/s41598-020-60544-y), 2020-03-04
Supplement: 41598_2020_60544_MOESM1_ESM.pdf [file 41598_2020_60544_MOESM1_ESM.pdf]

## Selective Targeting of Virus Replication by Proton Pump Inhibitors

Susan M. Watanabe<sup>a</sup>, Lorna S. Ehrlich<sup>a</sup>, Madeleine Strickland<sup>b</sup>, Xiaofan Li<sup>c</sup>, Veronica Soloveva<sup>d</sup>, Arthur J. Goff<sup>d</sup>, Charles B. Stauff<sup>a</sup>, Sumita Bhaduri-McIntosh<sup>c</sup>, Nico Tjandra<sup>b</sup> and Carol Carter<sup>a#</sup>

<sup>a</sup>Department of Microbiology and Immunology, Stony Brook University, Stony Brook, NY 11794-5222, USA; <sup>b</sup>Laboratory of Molecular Biophysics, National Heart, Lung, and Blood Institute, National Institutes of Health, Bethesda, MD, 20892, USA; <sup>c</sup>Department of Pediatrics, Division of Infectious Diseases and Department of Molecular Genetics and Microbiology, University of Florida, Gainesville, FL 32610, USA; <sup>d</sup>U.S. Army Medical Research Institute of Infectious Diseases, Frederick, MD, 21702-5011, USA.

#Corresponding authors:

Carol Carter: Department of Microbiology and Immunology, School of Medicine, Stony Brook University, Stony Brook, NY 11794-5222, USA; Tel. (631) 632-8801; email: carol.carter@stonybrook.edu

Nico Tjandra: Laboratory of Molecular Biophysics, National Heart, Lung, and Blood Institute, National Institutes of Health, Bethesda, MD, 20892, USA; Tel. (301) 402-3029; email: tjandran@nhlbi.nih.gov

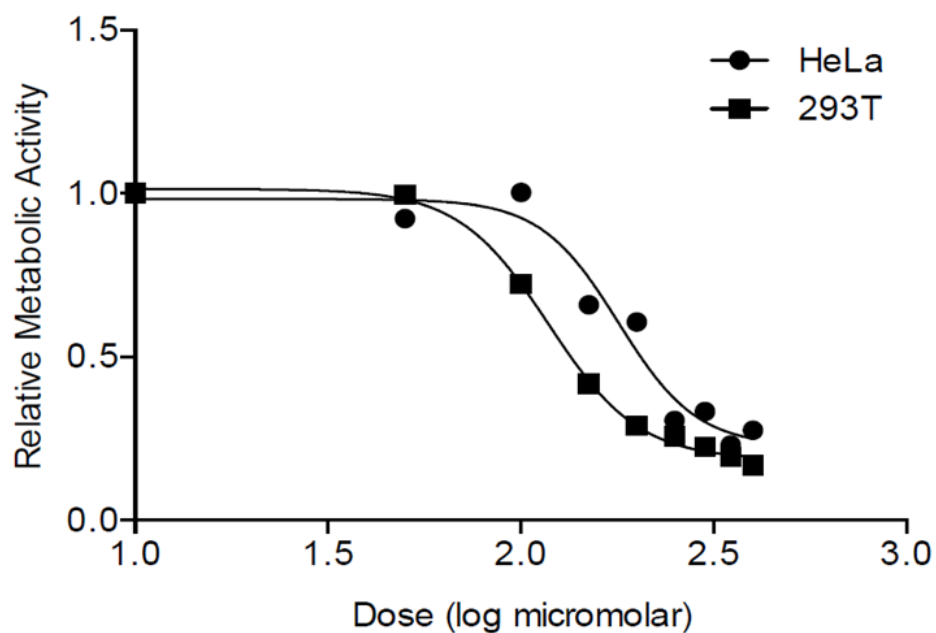

**Supplementary Figure S1.** Tenatoprazole effect on HeLa and HEK-293T cellular metabolism. Toxicity was determined by measuring metabolic activity (Roche, Cell Proliferation Reagent WST-1) after cells were grown for 24 hr with the drug. The CC<sub>50</sub> values determined for HeLa and 293T cells were 129  $\mu$ M and 123  $\mu$ M, respectively (Prism 6, Graph Pad Software Inc) with a goodness of fit R square values of 0.97 and 0.99, respectively.

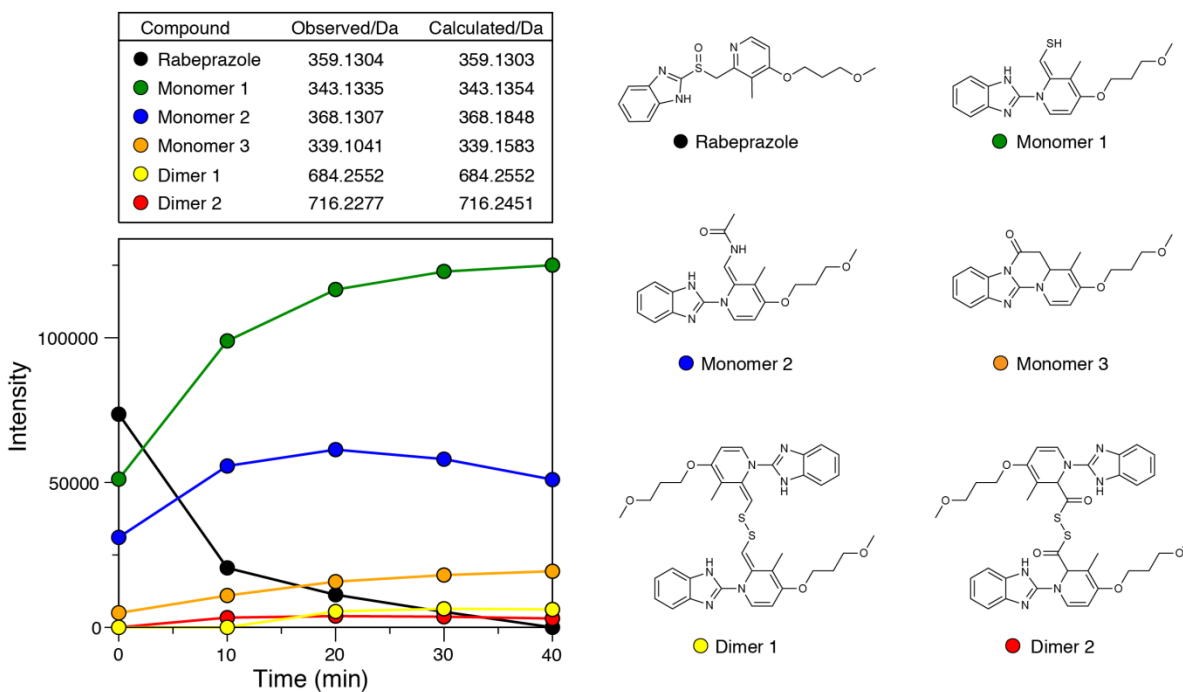

**Supplementary Figure S2.** Prodrug conversion to activated prazole. The formation of activated prazole was monitored using Ellman's reagent, which turns orange when it comes into contact with thiol (S-H) groups. Mass spec was used to detect the product in a time-dependent manner. Loss of prodrug correlates with the appearance of an active form. The molecules shown are suggestions likely to have the same molecular formula as the actual compounds.

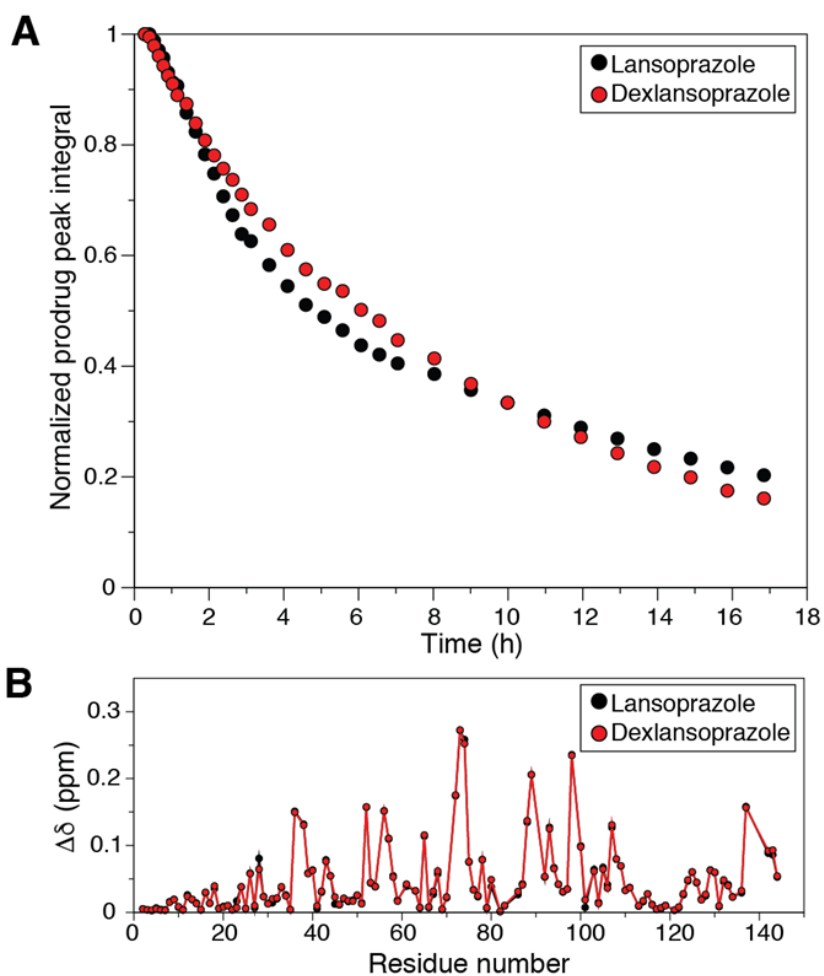

**Supplementary Figure S3.** Prazole degradation rate and chemical shift perturbations in Tsg101 UEV for racemic lansoprazole and single enantiomer dexlansoprazole. *Panel A*, Prodrug remaining at time intervals over a 17 hr examination period, measured using 1D NMR spectra. Peak heights were normalized to the initial reading for each prodrug and plotted against time. *Panel B*, Chemical shift perturbations in Tsg101 UEV complexed with lansoprazole and dexlansoprazole.

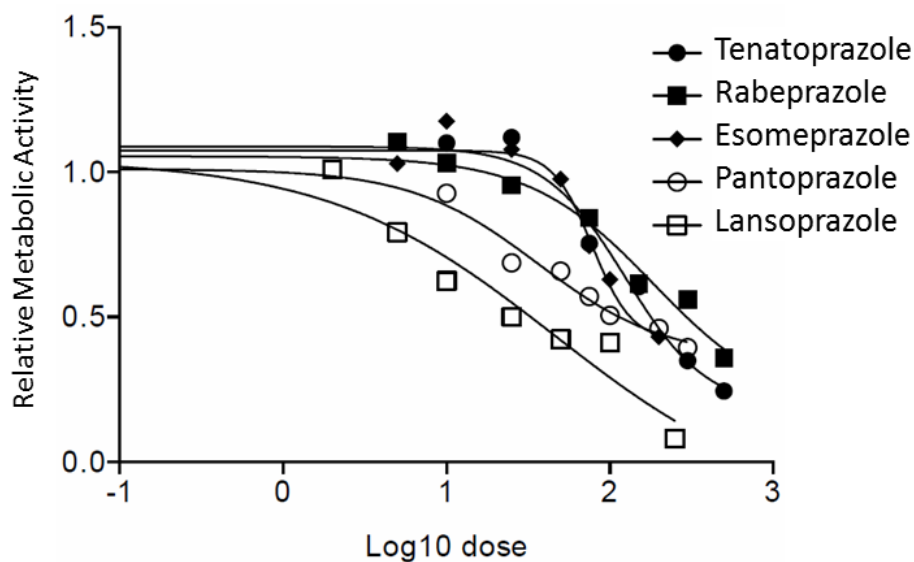

**Supplementary Figure S4:** Cellular metabolism measurements for tenatoprazole, esomeprazole, pantoprazole, rabeprazole, and lansoprazole. Metabolic activity was measured with a colorimetric assay (Roche, Cell Proliferation Reagent WST-1) after cells were grown for 24 hr with a drug. The  $CC_{50}$  values were: 125  $\mu$ M (tenatoprazole), 150  $\mu$ M (rabeprazole), 75  $\mu$ M (esomeprazole), 40  $\mu$ M (pantoprazole), 50  $\mu$ M (lansoprazole) as calculated by Prism 6, Graph Pad Software, Inc. The goodness of fit  $R^2$  values varied from 0.94 to 0.97.

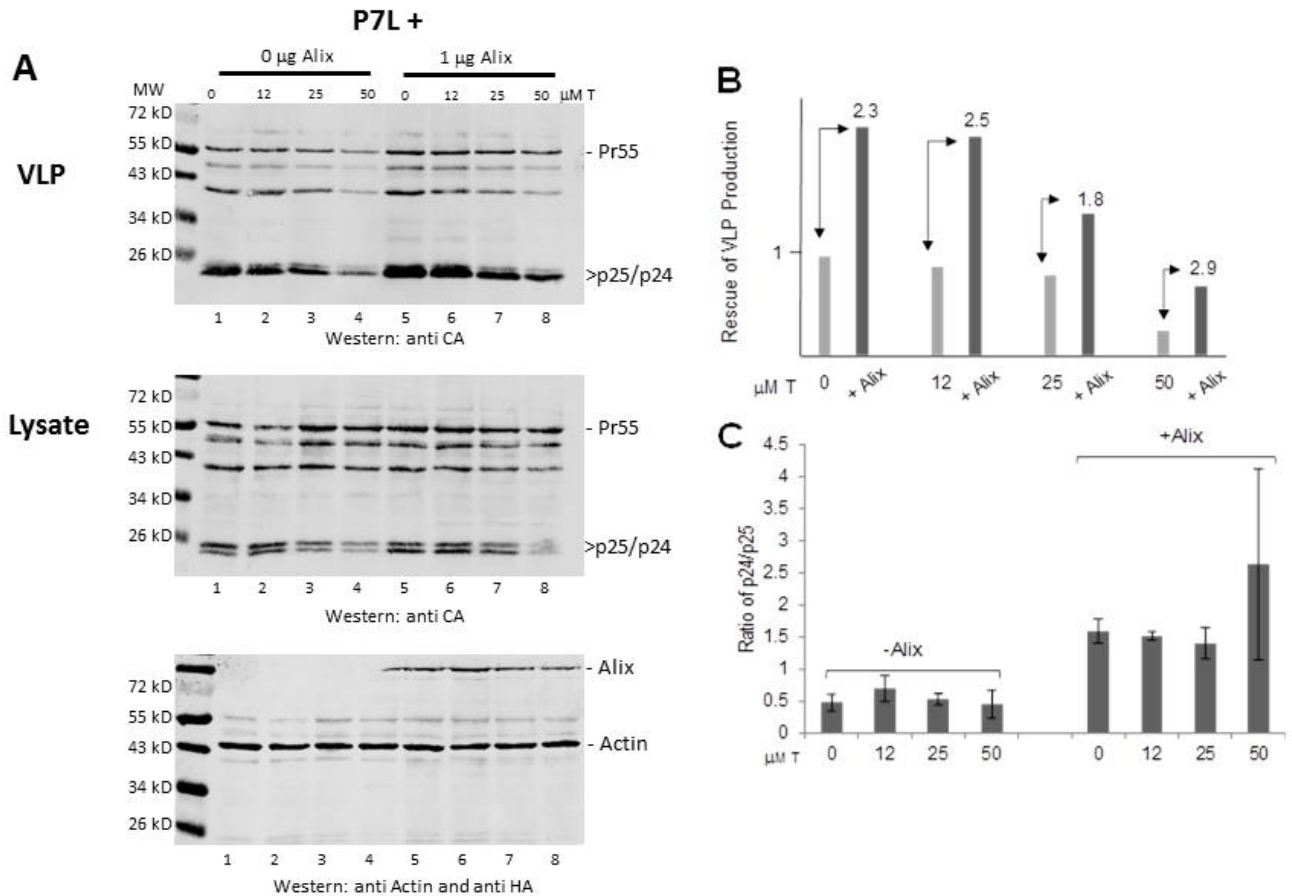

**SUPPLEMENTARY FIGURE S5.** Tenatoprazole effect on Alix-mediated rescue of pNL4-3-P7L-Gag release. **Panel A**, 293T cells were treated with DMSO (lane 1) or tenatoprazole (Lanes 2 to 4) six hours prior to transfection with DNA encoding pNL4-3-P7L-Gag (lanes 1-8) and DNA encoding HA-tagged Alix (lanes 5-8). Western blot analysis of viral particles (*top*) and cell lysates (*bottom*) for CA p24-related proteins, actin and Alix. **Panel B**, Quantitative analysis of Alix rescue of VLP production. VLP release efficiency was determined in the absence and presence of Alix and normalized to cellular Gag accumulation plus VLP-associated Gag (*i.e.*, VLP/(VLP + cellular Gag)). **Panel C**, Quantitative analysis of capsid maturation efficiency based on CAp25/p24 signals in the cell lysate.
